# Supplementary material for: Beautiful Lemons: Adverse Selection in Durable-Goods Markets with Sorting
Source: Atypon-hosted journal article supplement (doi:10.1287/mnsc.2016.2495), 2016-07-29
Supplement: mnsc.2016.2495-sm-data.zip [file Readme file.pdf › Readme file.pdf]

Readme file for:  
“Beautiful Lemons: Adverse Selection in Durable-Goods Markets with Sorting”  
by Jonathan R. Peterson and Henry S. Schneider  
Management Science  
February 2016

We have provided a semi-processed data file from the Consumer Expenditure Survey, which is cleaned further by the Stata do file that we have provided. The Stata do file also generates all of the empirical results in the paper. We have includes notes throughout the Stata do file documenting the purpose of the various parts of the program.

The data file is: repair2b.dta

The Stata do file is: (1) Cleaning and analysis.do
